# Supplementary material
Source: Springer Nature journal article supplement (https://www.springermedizin.de/resource/supplementary/12885_2004_147_MOESM7_ESM.pdf/9469006)

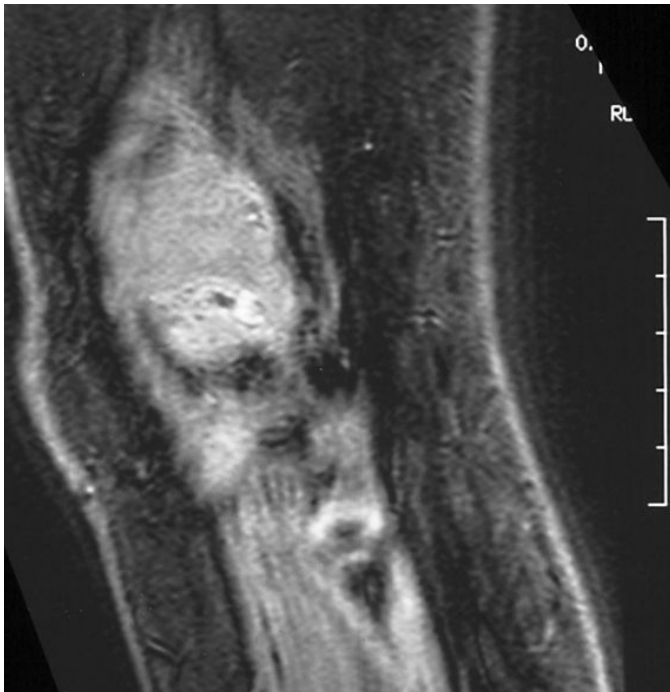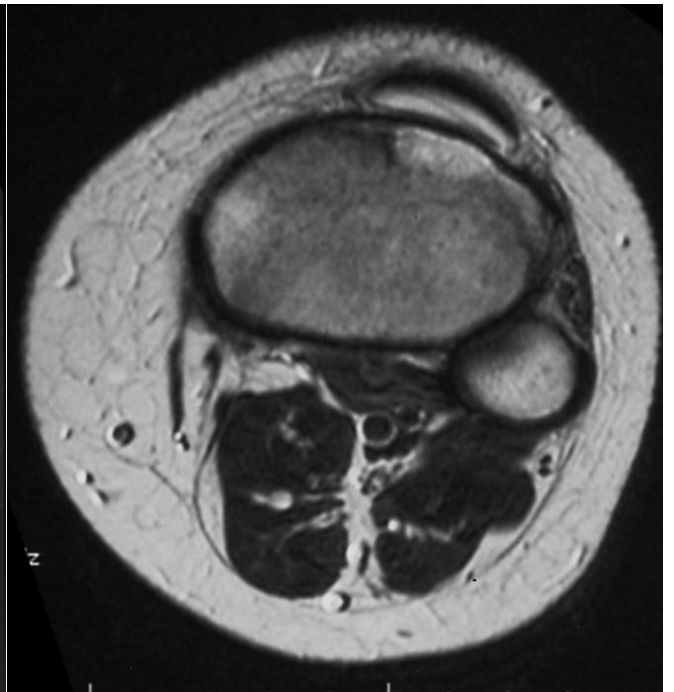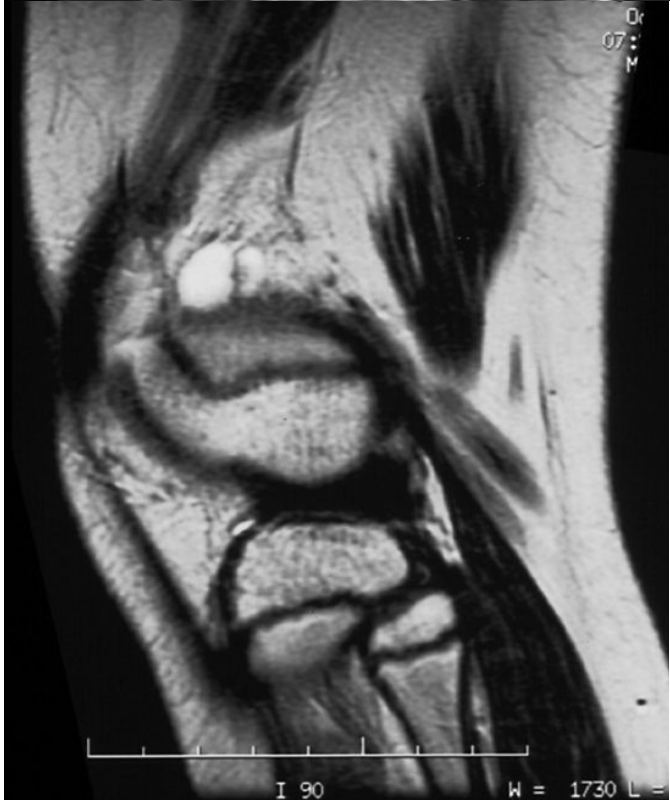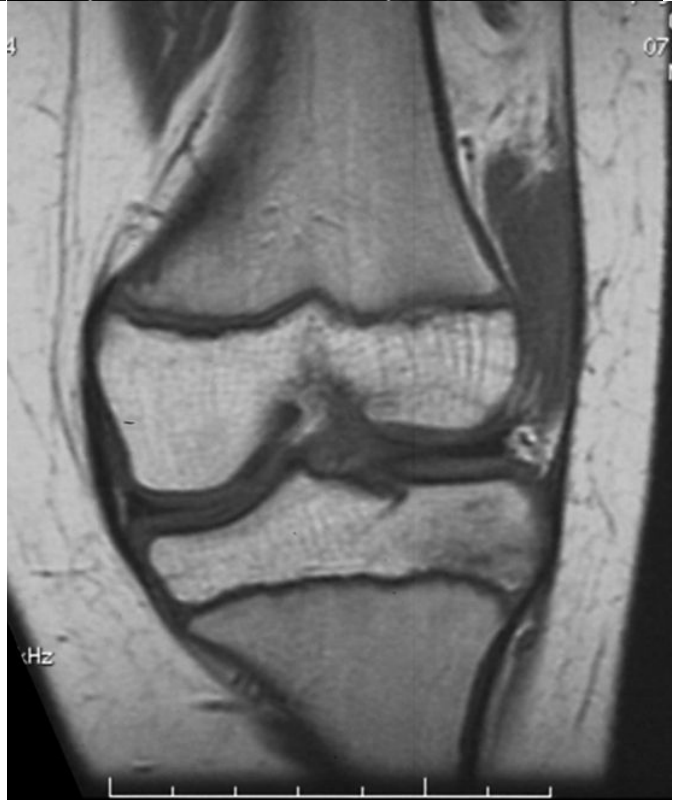

Supplement: MOESM7 [file 9469006]
